# Supplementary material for: Electrochemical identification of artificial oligonucleotides related to bovine species. Potential for identification of species based on mismatches in the mitochondrial cytochrome C1 oxidase gene
Source: Royal Society of Chemistry journal article supplement (doi:10.1039/c1an15414a), 2011-01-01
Supplement: c1an15414a.pdf [file c1an15414a.pdf]

**Table S1.** Values of Randle's equivalent circuit elements for ds-DNA films. Parentheses show the standard deviation of the five measured results.

| dsDNA       | Match Type | Zn present/absent | $R_s$ ( $\Omega \cdot \text{cm}^2$ ) | $C \cdot 10^{-6}$ ( $\text{F} \cdot \text{cm}^{-2}$ ) | $R_{ct}$ ( $\text{k}\Omega \cdot \text{cm}^2$ ) | $Q \cdot 10^{-5}$ ( $\text{S} \cdot \text{sec}^n \cdot \text{cm}^{-2}$ ) | n    | $R_x$ ( $\Omega \cdot \text{cm}^2$ ) | $\Delta R_{ct}$ ( $\text{k}\Omega \cdot \text{cm}^2$ ) |
|-------------|------------|-------------------|--------------------------------------|-------------------------------------------------------|-------------------------------------------------|--------------------------------------------------------------------------|------|--------------------------------------|--------------------------------------------------------|
| <b>I-1</b>  | Matched    | absent            | 0.1                                  | 1.8 (0.3)                                             | 4.4 (0.4)                                       | 1.4 (0.6)                                                                | 0.90 | 2.4 (0.5)                            | 2.6 (0.3)                                              |
|             |            | present           | 0.1                                  | 1.8 (0.1)                                             | 1.8 (0.2)                                       | 1.2 (0.3)                                                                | 0.92 | 2.6 (0.6)                            |                                                        |
| <b>I-2</b>  | Mismatched | absent            | 0.1                                  | 2.0 (0.3)                                             | 3.1 (0.7)                                       | 1.1 (0.3)                                                                | 0.94 | 2.3 (0.1)                            | 1.4 (0.3)                                              |
|             |            | present           | 0.1                                  | 2.1 (0.2)                                             | 1.7 (0.6)                                       | 1.0 (0.2)                                                                | 0.95 | 2.5 (0.2)                            |                                                        |
| <b>I-3</b>  | Mismatched | absent            | 0.1                                  | 2.2 (0.1)                                             | 2.3 (0.1)                                       | 1.7 (0.1)                                                                | 0.94 | 1.9 (0.1)                            | 1.0 (0.2)                                              |
|             |            | present           | 0.1                                  | 2.0 (0.1)                                             | 1.3 (0.3)                                       | 1.6 (0.1)                                                                | 0.94 | 2.0 (0.1)                            |                                                        |
| <b>II-1</b> | Mismatched | absent            | 0.1                                  | 2.2 (0.2)                                             | 3.1 (1.0)                                       | 1.6 (0.1)                                                                | 0.94 | 1.8 (0.2)                            | 1.1 (0.4)                                              |
|             |            | present           | 0.1                                  | 2.3 (0.3)                                             | 2.0 (0.8)                                       | 1.5 (0.3)                                                                | 0.95 | 1.8 (0.2)                            |                                                        |
| <b>II-2</b> | Matched    | absent            | 0.1                                  | 2.1 (0.3)                                             | 7.0 (3.5)                                       | 1.2 (0.2)                                                                | 0.91 | 2.0 (0.2)                            | 3.0 (0.8)                                              |
|             |            | present           | 0.1                                  | 2.4 (0.9)                                             | 4.0 (3.1)                                       | 1.6 (0.5)                                                                | 0.94 | 1.6 (0.1)                            |                                                        |
| <b>II-3</b> | Mismatched | absent            | 0.1                                  | 1.7 (0.3)                                             | 3.2 (0.6)                                       | 1.9 (0.6)                                                                | 0.91 | 1.9 (0.5)                            | 1.3 (0.2)                                              |
|             |            | present           | 0.1                                  | 1.9 (0.4)                                             | 1.9 (0.4)                                       | 1.6 (0.6)                                                                | 0.94 | 2.0 (0.4)                            |                                                        |

**Table S2.** Rate constants obtained from theoretical modeling of the experimental approach curves of the ds-DNA films before and after the addition of  $\text{Zn}^{2+}$ .

|             | Before Zn       |                                               | After Zn |                                             |
|-------------|-----------------|-----------------------------------------------|----------|---------------------------------------------|
|             | $K (10^{-2})^a$ | $k^0 10^{-5} (\text{cm}\cdot\text{s}^{-1})^b$ | $K$      | $k^0 10^{-5} (\text{cm}\cdot\text{s}^{-1})$ |
| <b>I-1</b>  | 5.5             | 2.4 $\pm$ 0.3                                 | 6.4      | 2.9 $\pm$ 0.1                               |
| <b>I-2</b>  | 9.0             | 4.0 $\pm$ 0.1                                 | 7.7      | 3.5 $\pm$ 0.1                               |
| <b>I-3</b>  | 8.4             | 3.7 $\pm$ 0.1                                 | 9.0      | 4.0 $\pm$ 0.05                              |
| <b>II-1</b> | 9.9             | 4.4 $\pm$ 0.1                                 | 9.0      | 4.0 $\pm$ 0.1                               |
| <b>II-2</b> | 6.4             | 2.8 $\pm$ 0.2                                 | 7.3      | 3.3 $\pm$ 0.2                               |
| <b>II-3</b> | 10              | 4.5 $\pm$ 0.2                                 | 12       | 5.4 $\pm$ 0.1                               |

a.  $K$  is a dimensionless rate constant obtained from curve fitting of the approach curves over dsDNA films.

b.  $k^0 = K \cdot D/a$ ; Diffusion coefficient,  $D = 5.6 \times 10^{-6} \pm 0.6 \text{ cm}^2/\text{s}$ ; area of the electrode,  $a = 0.0125 \text{ cm}$ .

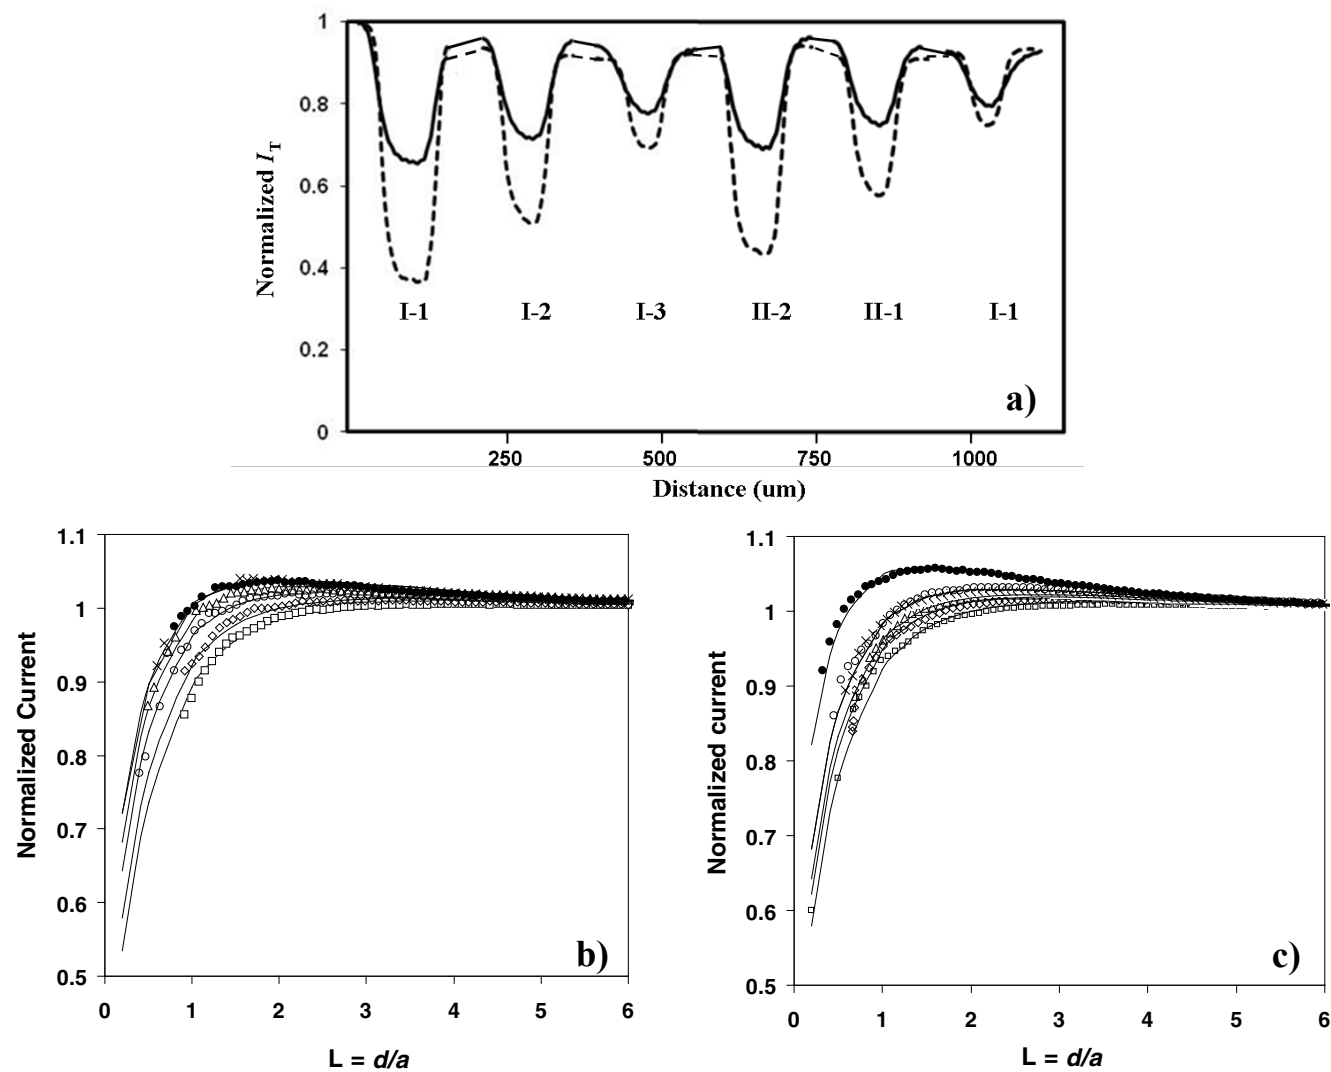

**Figure S1.** (a) Current profile extracted from the ds-DNA spots before (solid) and after (dashed) addition of  $Zn^{2+}$ . Normalized Approach curves obtained before (b) and after (c) the addition of  $Zn^{2+}$  over individual homo and hetero ds-DNA films I-1( $\square$ ), I-2 ( $\Delta$ ), I-3 (o), II-1 ( $\times$ ), II-2 ( $\diamond$ ), II-3 ( $\bullet$ ).
